# Supplementary material for: NO 3 chemistry of wildfire emissions: a kinetic study of the gas-phase reactions of furans with the NO 3 radical
Source: Copernicus journal article supplement (doi:10.5194/acp-22-1761-2022), 2022-02-04
Supplement: Supplementary file 1 [file acp-22-1761-2022-supplement.pdf]

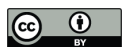

*Supplement of*

## **NO<sub>3</sub> chemistry of wildfire emissions: a kinetic study of the gas-phase reactions of furans with the NO<sub>3</sub> radical**

**Mike J. Newland et al.**

*Correspondence to:* Mike J. Newland ([mike.newland@cnrs-orleans.fr](mailto:mike.newland@cnrs-orleans.fr)) and Abdelwahid Mellouki ([mellouki@cnrs-orleans.fr](mailto:mellouki@cnrs-orleans.fr))

The copyright of individual parts of the supplement might differ from the article licence.

**Table S1** Relative  $k(\text{NO}_3)$  rates for each compound relative to each other for each experiment.

| <b>Compound1</b>          | <b>Compound2</b>          | <b>Reference</b> | <b><math>k_{\text{C1}}/k_{\text{R}}</math></b> | <b><math>k_{\text{C2}}/k_{\text{R}}</math></b> | <b><math>k_{\text{C1}}/k_{\text{C2}}</math></b> | <b>Date</b> |
|---------------------------|---------------------------|------------------|------------------------------------------------|------------------------------------------------|-------------------------------------------------|-------------|
| furan                     | $\alpha$ -angelicalactone | $\alpha$ -pinene | 0.25                                           | 0.466                                          | 0.536                                           | 04/05/21    |
| furan                     | furfural                  | cyclohexene      | 2.73                                           | 0.153                                          | 17.8                                            | 07/04/21    |
| furan                     | -                         | camphene         | 2.39                                           | -                                              | -                                               | 11/05/21    |
| 2-methylfuran             | -                         | 2-carene         | 1.30                                           | -                                              | -                                               | 26/03/21    |
| 2-methylfuran             | pyrrole                   | 2-carene         | 1.15                                           | 3.84                                           | 0.30                                            | 30/03/21    |
| 2-methylfuran             | -                         | $\alpha$ -pinene | 3.66                                           | -                                              | -                                               | 05/05/21    |
| 2-methylfuran             | -                         | TME              | 0.346                                          | -                                              | -                                               | 07/05/21    |
| 2,5-dimethylfuran         | 2-methylfuran             | 2-carene         | 5.60                                           | 1.26                                           | 4.46                                            | 01/04/21    |
| 2,5-dimethylfuran         | pyrrole                   | 2-methylfuran    | 4.60                                           | 3.04                                           | 1.52                                            | 02/04/21    |
| 2,5-dimethylfuran         | 2-methylfuran             | TME              | 2.12                                           | 0.398                                          | 5.33                                            | 19/04/21    |
|                           |                           | 3-M-3-buten-     |                                                |                                                |                                                 | 21/04/21    |
| furfural                  | -                         | 1-ol             | 0.367                                          | -                                              | -                                               |             |
| furfural                  | -                         | camphene         | 0.144                                          | -                                              | -                                               | 12/05/21    |
| $\alpha$ -angelicalactone | furan                     | cyclohexene      | 5.41                                           | 2.46                                           | 2.2                                             | 08/04/21    |
| pyrrole                   | -                         | TME              | 1.23                                           | -                                              | -                                               | 06/05/21    |
| pyrrole                   | -                         | TME              | 1.25                                           | -                                              | -                                               | 08/05/21    |

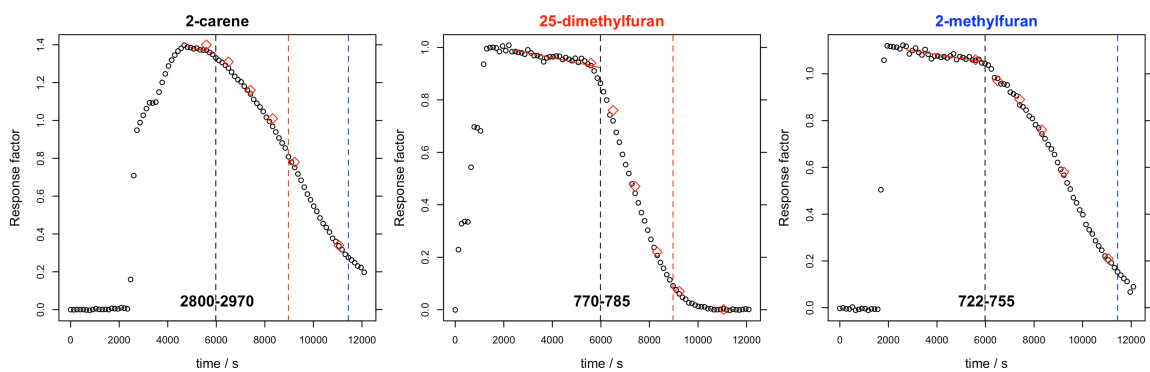

**Figure S1** Concentration-time profiles from experiment with 2-carene, 2,5-dimethylfuran and 2-methylfuran. Further plot details are as for Figure 1 in the main manuscript.

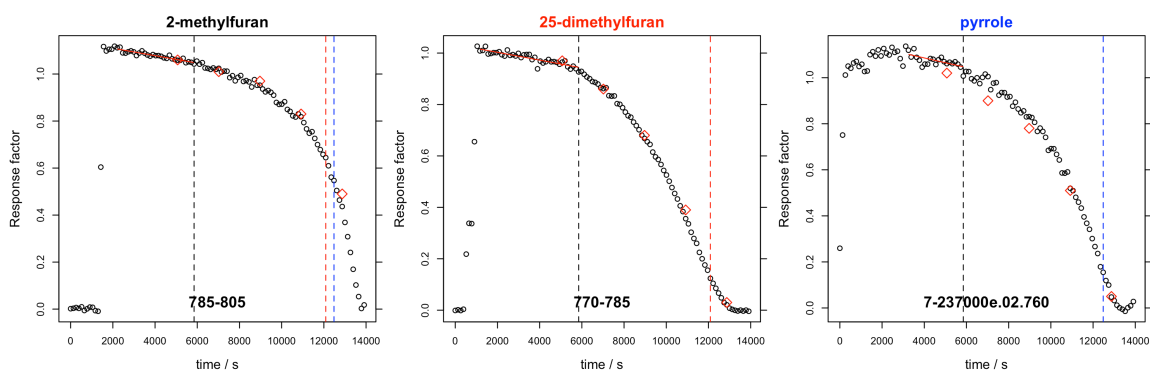

**Figure S2** Concentration-time profiles from experiment with 2-methylfuran, 2,5-dimethylfuran, and pyrrole. Further plot details are as for Figure 1 in the main manuscript.

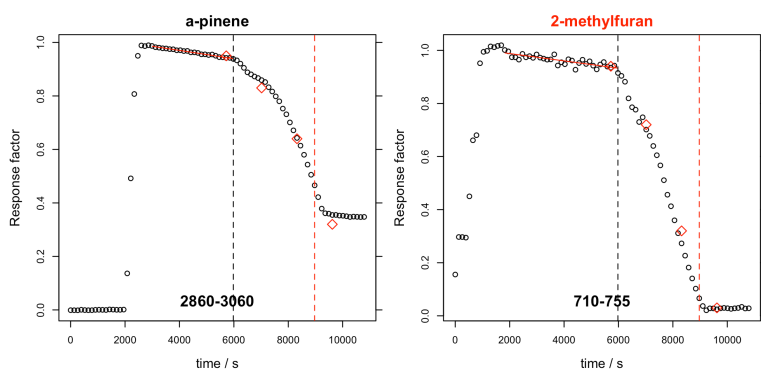

**Figure S3** Concentration-time profiles from experiment with  $\alpha$ -pinene, and 2-methylfuran. Further plot details are as for Figure 1 in the main manuscript.

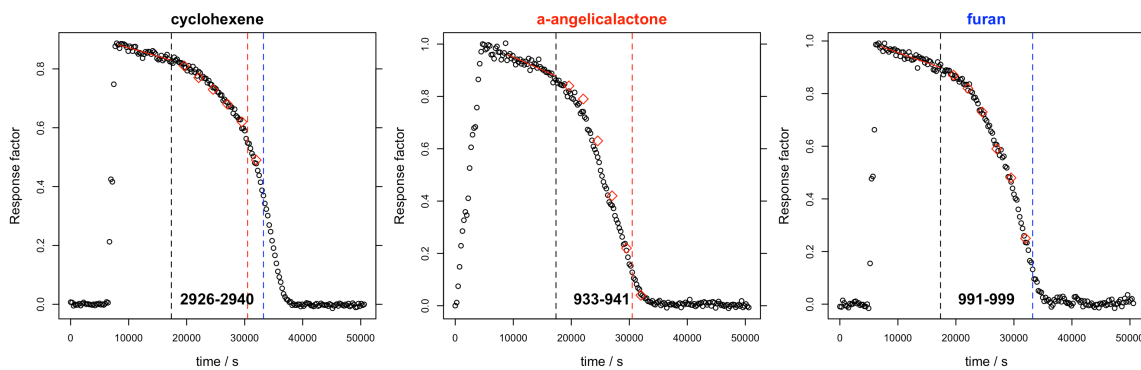

**Figure S4** Concentration-time profiles from experiment with  $\alpha$ -pinene, and 2-methylfuran. Further plot details are as for Figure 1 in the main manuscript.

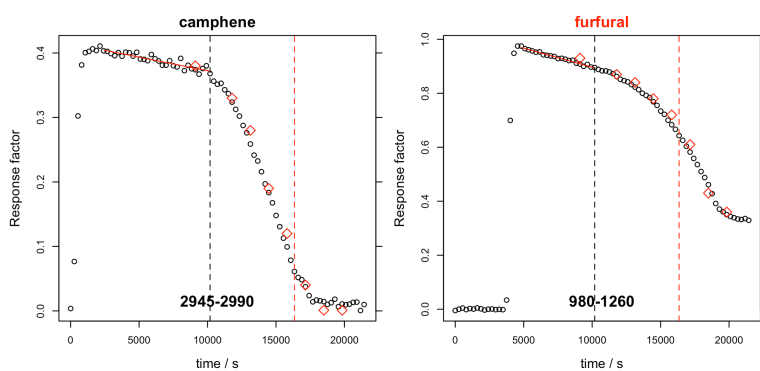

**Figure S5** Concentration-time profiles from experiment with camphene, and furfural. Further plot details are as for Figure 1 in the main manuscript.

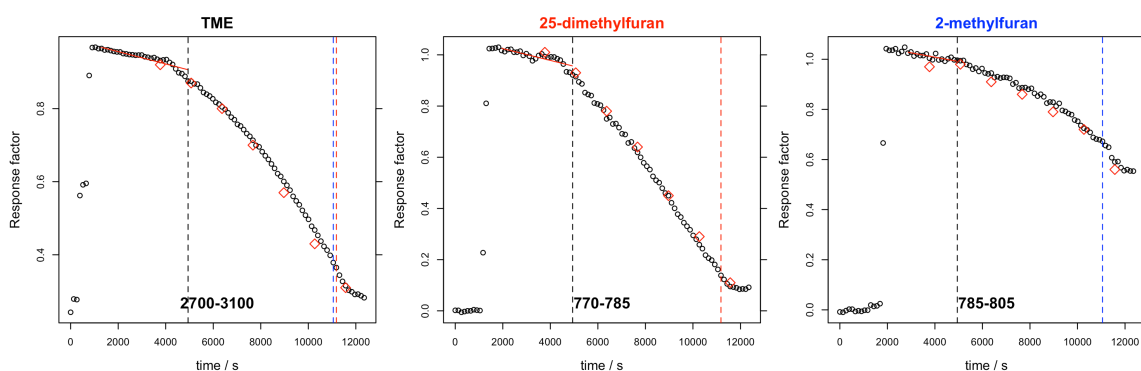

**Figure S6** Concentration-time profiles from experiment with 2-methylfuran, 2,5-dimethylfuran, and TME (2,3-dimethyl-2-butene). Further plot details are as for Figure 1 in the main manuscript.

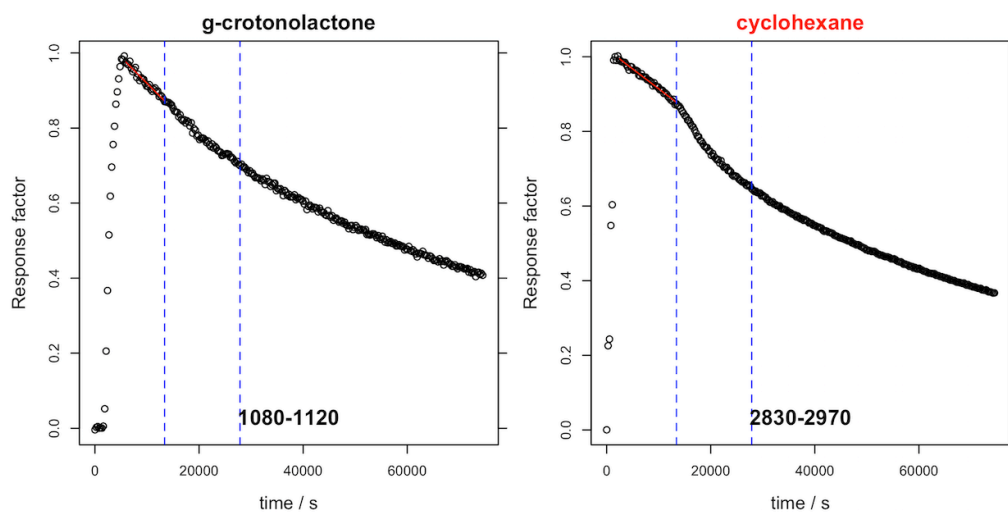

**Figure S7** Concentration-time profiles from experiment with  $\gamma$ -crotonolactone, and cyclohexane. Further plot details are as for Figure 1 in the main manuscript.

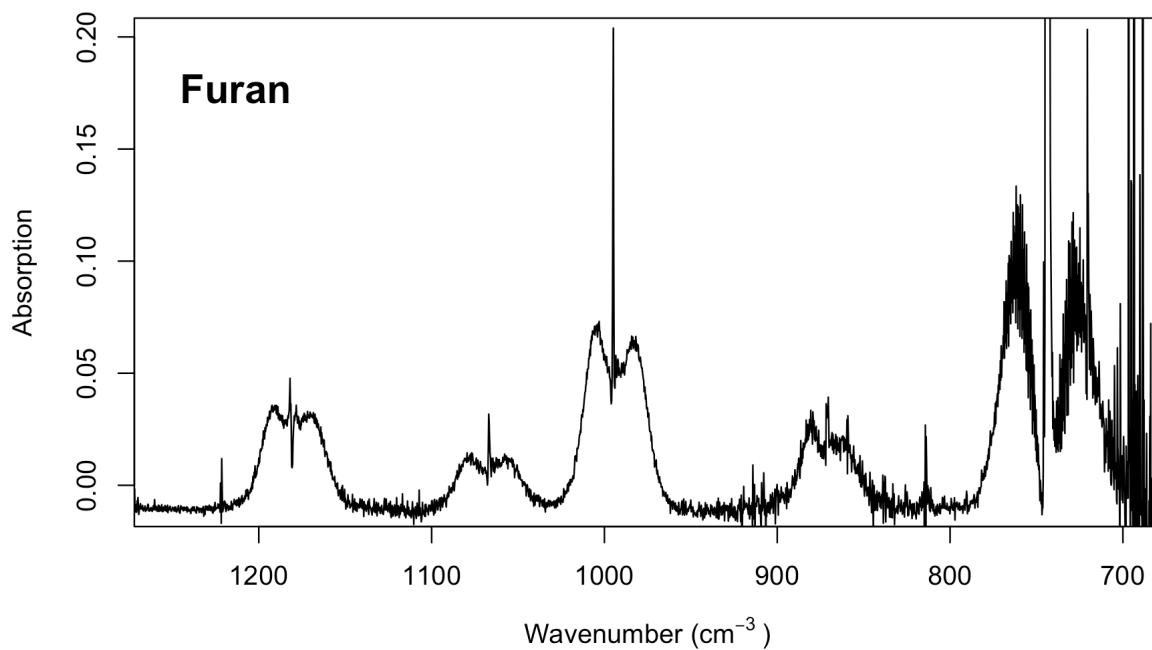

Figure S8 Reference spectrum of furan at a resolution of 0.25 cm<sup>-1</sup>

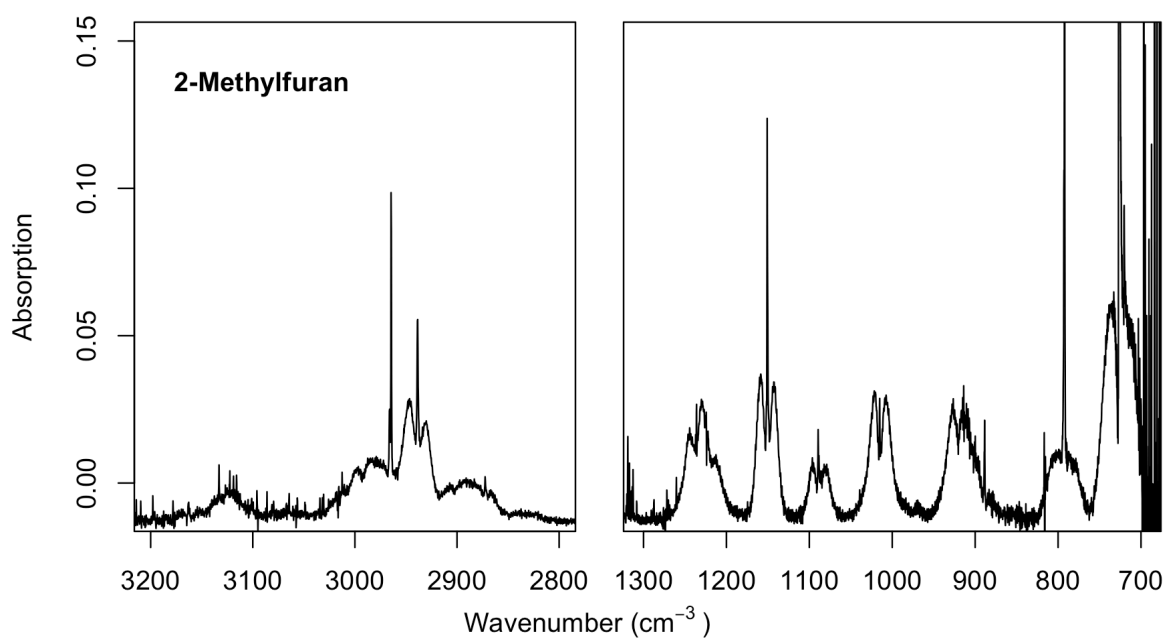

Figure S9 Reference spectrum of 2-methylfuran at a resolution of 0.25 cm<sup>-1</sup>

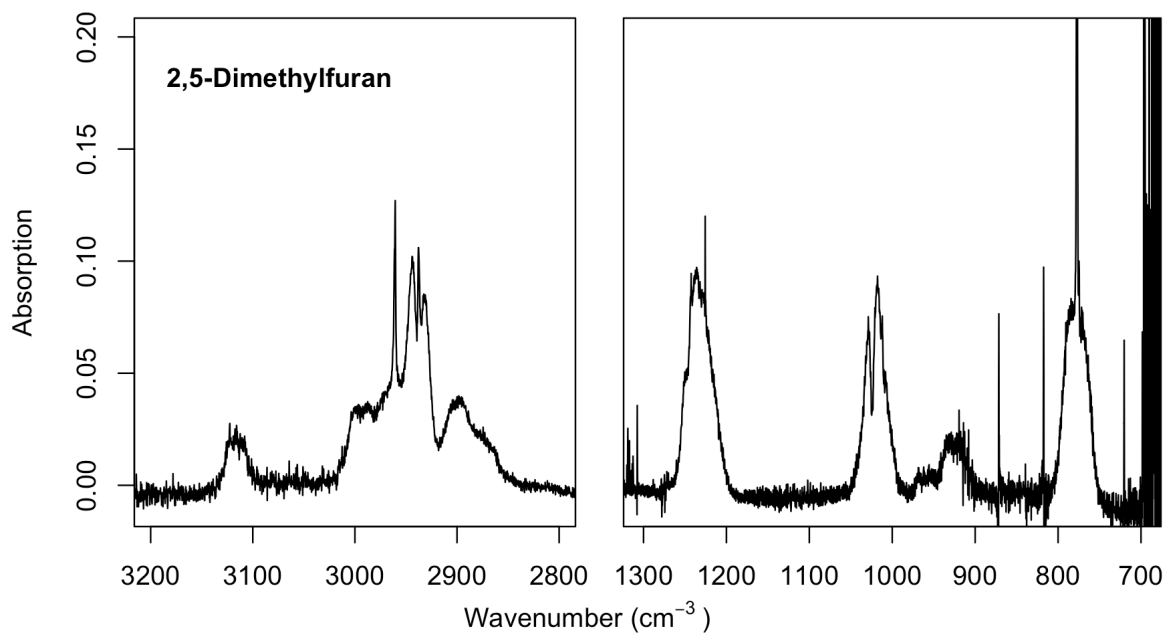

Figure S10 Reference spectrum of 2,5-Dimethylfuran at a resolution of  $0.25 \text{ cm}^{-1}$

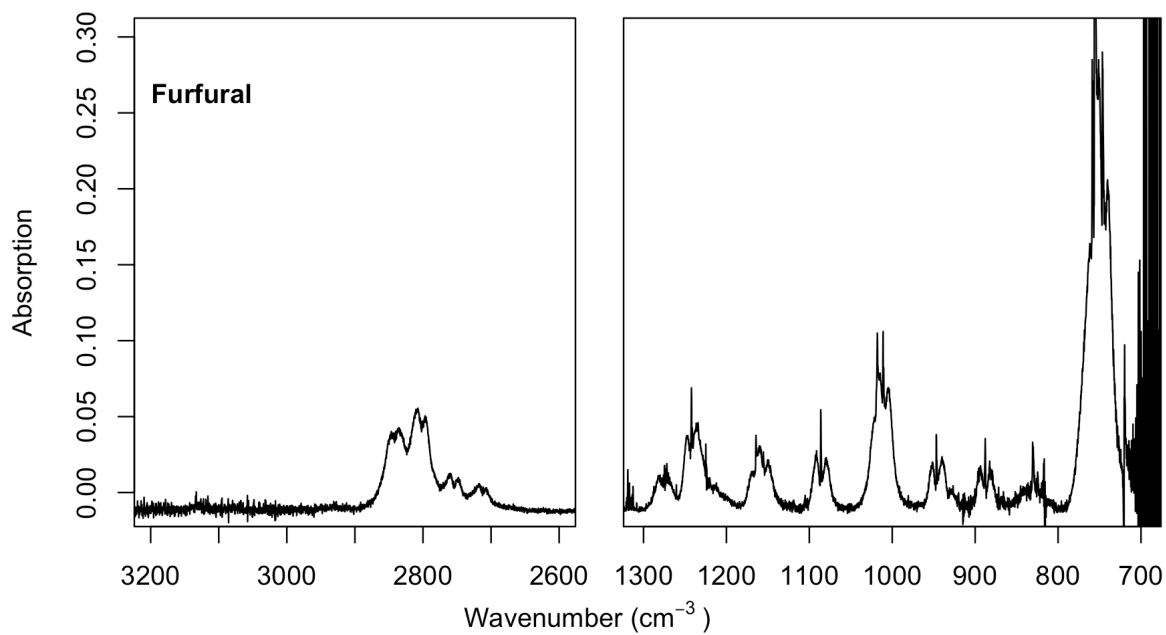

Figure S11 Reference spectrum of furfural at a resolution of  $0.25 \text{ cm}^{-1}$

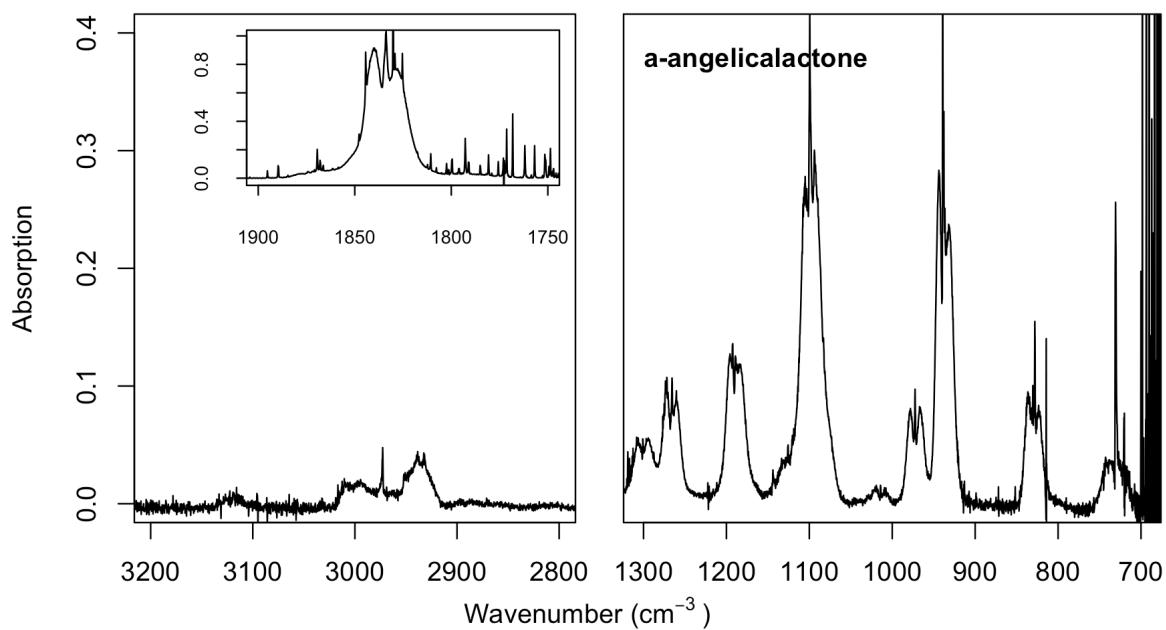

Figure S12 Reference spectrum of  $\alpha$ -angelicalactone at a resolution of 0.25 cm<sup>-1</sup>

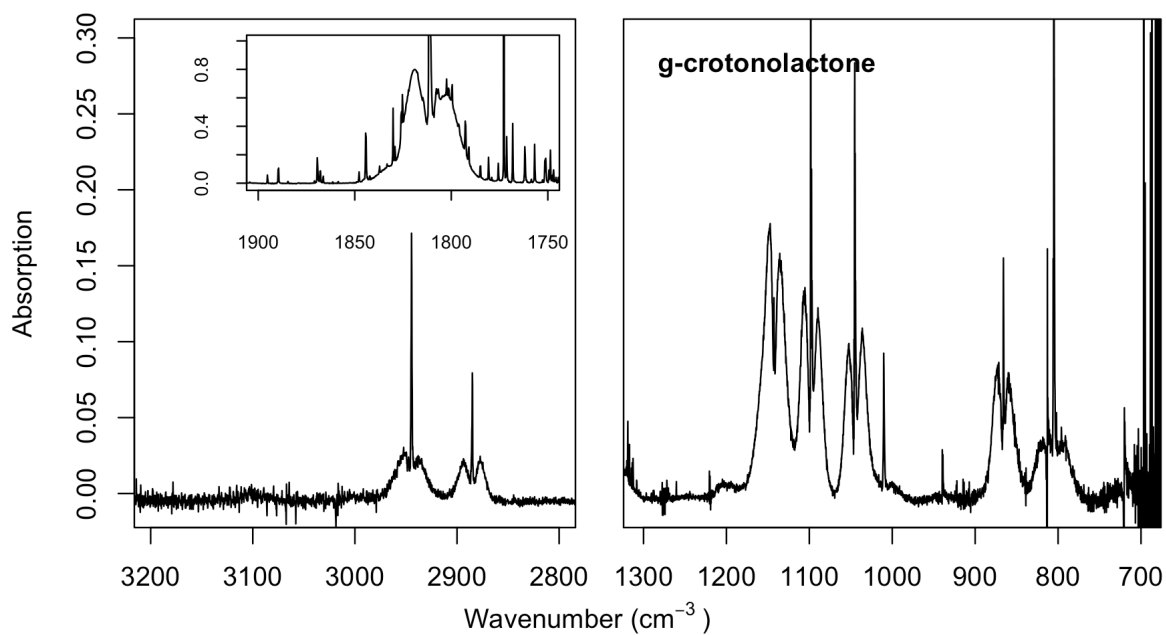

Figure S13 Reference spectrum of  $\gamma$ -crotonolactone at a resolution of 0.25 cm<sup>-1</sup>



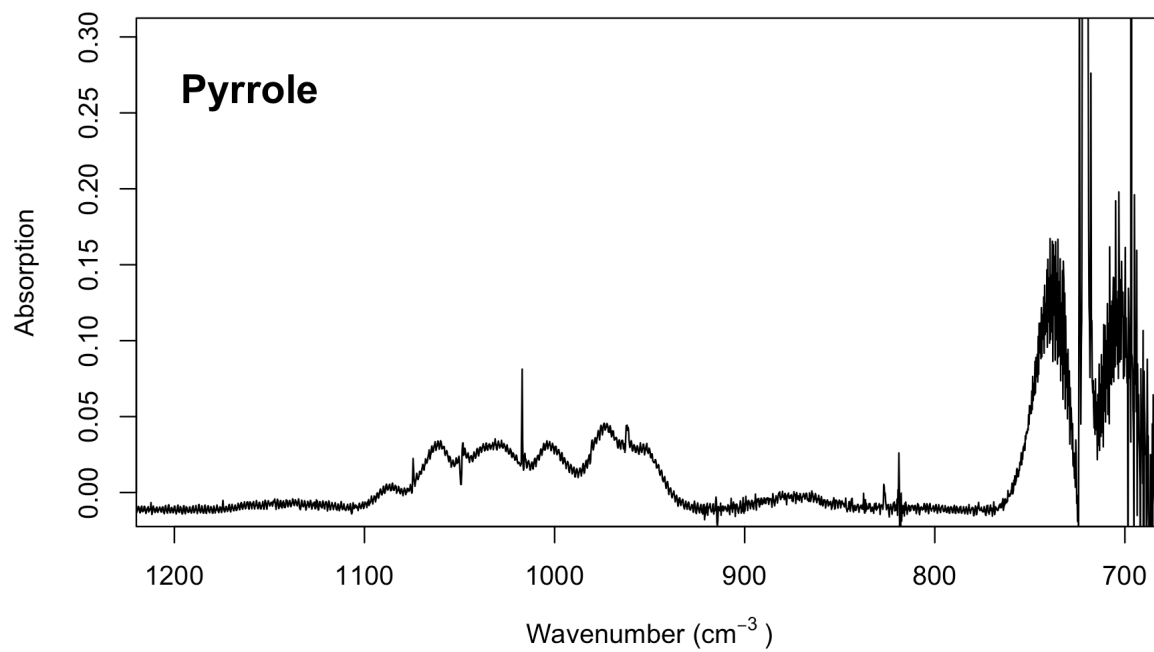

**Figure S14** Reference spectrum of pyrrole at a resolution of 0.25 cm<sup>-1</sup>
